## DNA Barcode Mosquitoes from La Pintada

Molecular Typing with COI - DNA Barcode of mosquitoes with medical importance from rural area of La Pintada, Antioquia, Colombia

Richard Hoyos-López<sup>1</sup>

<sup>1</sup>Grupo de Medicina Molecular y Translación, Universidad de Antioquia, Cra. 51D No. 62-69, Medellín, Colombia. +Corresponding author: rhoyoslopez@gmail.com.

Summary. DNA barcode is a methodology that allows the identification of species using a short fragment of cytochrome oxidase I and library sequences stored in the barcode of life database (BOLD), make up an alternative tool for mosquito identification in areas epidemiologically active for arboviruses, protozoa and bacteria. In our study, we collected 114 adult mosquitoes in a rural area in the municipality of La Pintada (Antioquia, Colombia), and were separate for genus and species using morphological keys. Two Legs were taken of specimens mounted, and these were used for DNA extraction, amplification of COI-Barcode through PCR and sequencing. 38 sequences were characterized of seven mosquito species and used in BOLD for molecular identification, subsequent characterization of genetic distances intra/interspecies, and MOTUs grouping by neighbor-joining analyses. Seven MOTUs were separate corresponding to seven species identify by morphological keys. BOLD was able to identify five species, and two were identified to the genre. The following medically important mosquitoes were recorded in the rural area from La Pintada

(Antioquia): *Aedes aegypti*, *Anopheles triannulatus*, *Coquillettidia nigricans*, *Mansonia titillans*, *Ochlerotatus angustivittatus*, *Psorophora ferox* and *Psorophora (Grabhamia) sp.*

Key words: Mosquitoes, DNA barcode, BOLD, Genetic distances, Neighbor-joining.

Financial support: COLCIENCIAS (Grant-111599326198) and COLCIENCIAS (Convocatory 528 – Scholarships for PhD students).

Mosquitoes (family Culicidae), comprise a monophyletic taxon and diverse group with 3,490 species recognized in temperate and tropical regions of the world (Harbach & Howard 2007). 150 species mainly belonging to genera *Anopheles*, *Aedes* and *Culex* have been incriminated as vectors of pathogens that cause disease in human populations, these pathogens include arboviruses (mainly Togaviridae, Flaviviridae, Bunyaviridae), filarial worms (helminths) and protozoa (*Plasmodium spp.*) (Gubler 2002; Harbach 2007).

Despite their medical importance, the taxonomy of mosquitoes is far from complete and is a critical step for epidemiological studies, vector incrimination, natural infection rates with pathogens and control/prevention measures (Harbach & Kitching 1998; Reinert *et al.* 2004; Cywinska 2006). Traditionally, morphology-based taxonomy have been used for species identification of mosquitoes, but this procedure is time consuming and not always sufficient for identification to the species level;

therefore, is necessary a multidisciplinary approach to taxonomy that includes morphological, molecular and data distribution (Krzywinski & Besansky 2003).

An alternative methodology was developed by Hebert et al. (2003), which involves the analysis of short genomic regions that can discriminate morphologically recognized animal species (DNA barcodes), suggesting that mitochondrial gene cytochrome c oxidase subunit 1 (COI) can serve as a uniform target gene for a bio-identification system (Valentini *et al.* 2008). The ability of DNA barcodes to identify species reliably, quickly and cost-effectively has particular importance in medical entomology, where molecular approaches to diagnoses species are often of great benefit in the identification of all life stages, from eggs to adults (Cywinska 2006). The fast identification of mosquitoes with medical importance is an urgent topic for increase the taxonomic knowledge between pathogens and their invertebrate vector insects (Besansky *et al.* 2003).

DNA barcode is an alternative tool successfully working with other insect vectors with medical importance as Simuliidae (Rivera & Currie 2009), Phlebotomine sandflies (Azpurua *et al.* 2010; Hoyos *et al.* 2012a; Kumar *et al.* 2012, Contreras *et al.* 2014) and Tabanidae (Cywinska *et al.* 2010), achieving the characterization and fast identification of species in epidemiologically active zones for diseases transmitted for those insects. In mosquitoes, there is a significant progress in the molecular typification of medically important species using this approach in some countries as Canada (Cywinska *et al.* 2006), India (Kumar *et al.* 2007), Pakistan (Ashfaq *et al.*

2014), Argentina (Díaz-Nieto *et al.* 2013), Japan (Taira *et al.* 2012), Ecuador (Linton *et al.* 2013) and China (Wang *et al.* 2012). DNA barcode also been used in studies about mosquito species complex (Kumar *et al.* 2013), identification of potential vector of arboviruses (Golding *et al.* 2012; Hoyos *et al.* 2015a) and integrative taxonomy (Ruiz *et al.* 2010; Ruiz *et al.* 2012; Laurito *et al.* 2013).

Colombia has large areas of disease transmission involving mosquitoes; among them is malaria, dengue (DENV), yellow fever (YFV), Venezuelan equine encephalitis (VEEV) and other arboviruses of low circulation (Tinker & Olano 1993; Groot *et al.* 1996; Rodríguez *et al.* 1995; Rivas *et al.* 1995; Ferro *et al.* 2003; Mattar *et al.* 2005; Montoya-Lerma *et al.* 2011; Hoyos *et al.* 2015a; Hoyos *et al.* 2015b; Hoyos *et al.* 2015c; Hoyos *et al.* 2016). The Antioquia department is a geographic area with a significant diversity of ecosystems, reservoirs and natural hosts, that makes possible the emerging and re-emerging diseases and epidemic outbreak event; in this context, few researches have been realized studies about diversity of mosquito species in zones with ecological characteristic that allow natural circulation of emerging and re-emerging pathogens (Parra 2012; Hoyos *et al.* 2012b). In our study, we used DNA barcode methodology for molecular typing for mosquito species of medical importance present in the rural area on the municipality of La Pintada (Antioquia).

## MATERIALS AND METHODS

Mosquito collection. Mosquitoes used in this study were collected between February – April in 2012 in rural area from La Pintada (5°44'25.63" N, 75°36'20.18" W), department of Antioquia, Colombia. Adults were collected using CDC - light traps and manual aspirators close to rural forest patch. The traps were placed before sunset and insects were collected the following morning (6:00 p.m. to 6:00 a.m). Collected mosquitoes were stored in cryovials, placed in a liquid nitrogen tank and transported to the laboratory of Biology and Insect Systematics from National University of Colombia, Medellín. Specimens were separated considering genus, external morphological characteristics, date/site collection, for facilitate the morphological identification with pictorial keys (Gabaldon *et al.* 1946; Lane 1953; Cova-García *et al.* 1966; Forattini 2002) and molecular procedures.

Molecular protocols. Two legs were taken from selected mosquitoes identified and used for DNA extraction with commercially available DNeasy Blood & Tissue kit (Qiagen, Maryland). Amplification of the ~658 nt fragment of DNA barcode region from mitochondrial Cytochrome oxidase I gene was achieved using the primer pair LCO-1490/HCO-2198 (Folmer *et al.* 1994; Hebert *et al.* 2003. Each PCR-mix contained 1x NH<sub>4</sub>SO<sub>4</sub> buffer, 1 mM each DNTP, 5 mM of MgCl<sub>2</sub>, 0.5 uM each primer, 0,4 U of taq polymerase (Bioline, Maryland) and 4 uL of DNA template and was made up to a total volume of 50 uL using water for molecular biology quality. The PCR thermocycler parameters included: a single cycle at 94°C for 10 min, followed by 35 cycles of 95°C

for 60 s, 50°C for 60 s and 72°C for 60 s, respectively terminating with a 72°C for 5 min of final extension step and 4°C hold. PCR products were visualized on 1% agarose gels, containing GELSTAR® (Lonza, Rockland) diluted 1/50 using a Dark Reader lector (IMGEN, Alexandria). PCR products were sequenced using same primers LCO/HCO in Macrogen sequencing service (Seul, Korea).

Data analyses. Sequences were edited manually using Bioeditv7.2.0 (<http://www.mbio.ncsu.edu/BioEdit/bioedit.htm>) and aligned in ClustalW (Larkin *et al.* 2007). Genetic distances was calculated in MEGA v6.0 (Tamura *et al.* 2013) using the kimura 2-parameter distance model (K2P) (Kimura 1980), and molecular operational taxonomic units (MOTUs) was evaluated using clusters on dendrogram and genetic distances. In this sense, a neighbor-joining tree (NJ) (Saitou & Nei 1987) was generated using K2P and bootstrap (1,000 replicates) (Felsenstein 1982). For some species with more than four sequences were calculated estimates of genetic diversity as diversity haplotype and polymorphic sites, using DNAspv5.0 software (Librado & Rozas 2009).

## RESULTS

A total of 114 mosquitoes were collected in the rural area from municipality of La Pintada (Antioquia), and seven species mosquitoes were identified: *Ochlerotatus* (*Ochlerotatus*) *angustivittatus* (n = 52) (Dyar & Knab 1907), *Mansonia* (*Mansonia*) *titillans* (n = 13) (Walker 1848), *Aedes* (*Stegomyia*) *aegypti* (n = 18) (Linnaeus 1762),

*Psorophora (Janthinosoma) ferox* (n = 14)(Von Humboldt 1819), *Coquillettidia (Rhynchotaenia) nigricans* (n = 9) (Coquillett 1904), *Anopheles (Nyssorhynchus) triannulatus* (n = 1) (Neiva & Pinto 1922) and *Psorophora (Grabhamia) sp* (n = 7).

38 DNA barcode sequences (19 haplotypes) belonging to seven species representing six genera were obtained and compared to those available in BOLD database for verify taxonomic identifications; four species were confirmed, two only were possible determine genera because species was not released in the database, and one not show homology with any other mosquitoes sequence (Table I). Intra-specific genetic distances and haplotypes in seven species were low and within ranges previously reported as corresponding like inside species (0 – 0.01). Interspecies genetic distance it were consistent and in the range between species from different genera (Table II). However, genetic variability of mosquitoes was low in haplotypes also showing a low number of polymorphic sites. The separation of mosquito species by genetic distances was confirmed through the neighbor-joining dendrogram and MOTU's grouped (Fig. 1).

*Ps. (Grabhamia) sp*, despite being separate with DNA barcode sequences from *Ps. ferox*; the females collected could not be identified morphologically to species, and males not were collected for taxonomic verification.

## DISCUSSION

Correct identification of the insect vector is the one most important factors in the study of the arboviruses and protozoa diseases (Cook *et al.* 2005; Besansky *et al.* 2003), and the precise identification of the target species has direct medical and practical implications, particularly in developing vector control strategies (Dhananjeyan *et al.* 2010; Zamora *et al.* 2015).

Taxonomy mosquito has been achieved mostly using morphological characteristics, cyto-genetics and iso-enzymes markers; recently, the molecular approaches have significant improvement in the accuracy of species identification using DNA barcodes (Cywinska *et al.* 2006; Kumar *et al.* 2007; Ruiz *et al.* 2010; Golding *et al.* 2012; Ruiz *et al.* 2012; Wang *et al.* 2012). The Barcode - COI region in mosquitoes is characterized by a high rate of evolution (transitions/transversions) (Cywinska *et al.* 2006) allowing the estimation of biodiversity based in molecular operational taxonomic units (MOTUs) (Blaxter 2004).

In our study, seven MOTUs were separate by genetic distances (K2P) and tree building criteria with neighbor-joining dendrogram. Genetic distances showed similar values to reported within (0 – 0,010) and between species (0,108 – 0,176) in other studies (Cywinska *et al.* 2006; Kumar *et al.* 2007; Wang *et al.* 2012). Genetic diversity of DNA barcodes was low in mosquitoes collected; these results probably evidenced selective process that decreases haplotype diversity in natural populations by urban aspersions



of insecticides and/or pesticides for rural crops and fragmentation of natural habitats (Ocampo & Wesson 2004; Yanoviak *et al.* 2006; Keesing *et al.* 2010).

The six species identified have a great relevance in epidemiology and medical entomology, because they have been founded infected with human pathogens as arboviruses and protozoa in Colombia and nearby countries:

- *Ae. aegypti* is responsible for the transmission of Dengue virus, the most important arboviruses in Colombia (Tinker & Olano 1993), and was vector of Yellow Fever virus in urban zones after his eradication (Rodriguez *et al.* 1996). The blood feeding pattern is anthropophilic, and is well adaptive to urban areas (Harrington *et al.* 2001).
- *Ps. ferox*, females of this species frequently carry eggs of *Dermatobia* in eastern of Colombia and have also been found infested with *Dermatobia* eggs in Panama (Carpenter & LaCasse 1955). Groot *et al.* (1996), determines natural infection of mosquitoes from this species for Venezuelan encephalitis equine virus, Ilheus, Mayaro and Una virus in San Vicente de Chucurí (Santander); Wyeomyia virus was detected too in pools of *Ps. ferox* from middle Magdalena valley. In other countries, *Ps. ferox* has been found with Jamestown Canyon virus (California, EEUU) (Andreadis *et al.* 2008), Venezuelan equine encephalitis virus in Alabama (EEUU) (Chamberlain *et al.* 1956), Mayaro (Brazil) (Muñoz & Navarro 2012), Rocio virus (Brazil) (Souza *et al.* 1981) and West Nile virus (EEUU) (Kulasekera *et al.* 2001; Andreadis *et al.* 2004).

- *Ma. titillans*, their larvae prefer small lakes, ponds, rivers with little stream and swamps, associate with floating plants as water lettuce - *Pistia stratiotes* - (Lounibos & Linley 2008). Blood feeding patterns showing are broad spectrum with a tendency to mammals and birds (Edman & Kale 1971). Parra *et al.* (2012) recorded this species in forest fragments from Uraba (Antioquia) closed to human habitats and Groot *et al.* (1996), found insects infected with Venezuelan encephalitis equine virus in Magangué (Bolívar) in 1970-1971. In alligator farms from Florida (EEUU) had been register with West Nile virus (Unlu *et al.* 2010).
- *An. triannulatus* is a species complex evidenced with variations in male genitalia, eggs, larvae and molecular markers (Rosa-Freitas *et al.* 1998; Silva do Nascimento *et al.* 2002; Silva do Nascimento *et al.* 2006; Rosero *et al.* 2012; Moreno *et al.* 2013), these mosquito species is implied in transmission of *Plasmodium vivax* in Brazil (Benarroch 1931; Gabaldon *et al.* 1946; Oliveira-Ferreira *et al.* 1990; Tadei *et al.* 2000), Perú (Aramburú *et al.* 1999) and recently in the locality of La Capilla (El Bagre, Antioquia) from Colombia (Naranjo *et al.* 2013).
- *Cq. nigricans*. The habits of this mosquito are similar to *Mansonia* species and founded naturally infected with the genotype IE Caribbean/Gulf of Venezuelan equine encephalitis virus in Mexico (Adams *et al.* 2012).

- *Oc. angustivittatus*. Females are founded in environments sylvatic, peridomestic and inside houses, with bite-tendency to equines and domestic animals (Parra et al 2012). In Panamá had been recorded with Ilheus virus and Venezuelan equine encephalitis virus in Colombia (Forattini 2002).

DNA barcode is a successful tool for rapid identification of mosquitoes, biodiversity estimation, epidemiological studies on unexplored zones, and ecology of emerging diseases transmitted by mosquito vectors, however, is indispensable use different approximations for the analysis of sequences and not over/under-estimate molecular diversity (Meier *et al.* 2006; Blaxter 2004; Valentini *et al.* 2008). In our study, we achieved identify several species fundamentally mosquitos associate to rural areas, about these species, there is enough sequences in BOLD for a clear identification using different kind analysis, but sylvatic/forest species are more difficult as noted in rural areas from La Pintada, in part is due to lack of sequences from mosquitoes identified belonging to these unexplored ecosystems, however, DNA barcode allowed molecular separation, as be observed in *Ps. (Grabhamia)* sp.

Some species founded in La Pintada (Antioquia) as *Ps. ferox* and *Ma. titillans* are species with long dispersal ability from fragment forest to open areas (Mendez *et al.* 2001), allowing dispersion of arboviruses to susceptible hosts (adjacent human population and domestic animals) and vectors adapted to artificial ecosystems (farms, field crops), as *Ae. aegypti* populations could be origin to epizootia or epidemic break in humans (Tanaka *et al.* 1979; Tinker & Olano 1993; Oda *et al.* 1999; Pecor *et al.*

2002; Hoyos et al. 2015d). The ecological context present in La Pintada (Antioquia, Colombia), make this locality susceptible to emerging and re-emerging pathogens, due to changes in community of mosquitoes in rural and urban environments (Yanoviak *et al.* 2006, Keesing *et al.* 2010).

Is recommended begin more research in bite-behavior rates, detection of emerging and re-emerging pathogens (alphavirus and flavivirus groups), and natural habitats (phytotelmata), for identify human epidemiological risk in rural populations and establish future measures of control and prevention for diseases.

## **ACKNOWLEDGEMENTS**

To Diego Arias and Diego Puerta for his assistance in entomological surveys and laboratory work.

## **REFERENCES**

- Adams AP, Navarro-Lopez R, Ramirez-Aguilar FJ, Lopez-Gonzalez I, Leal G, et al. 2012. Venezuelan Equine Encephalitis Virus Activity in the Gulf Coast Region of Mexico, 2003–2010. *PLoS Negl Trop Dis* 6(11): e1875.
- Andreadis TG, Anderson JF, Armstrong PM, Main AJ 2008. Isolations of Jamestown Canyon virus (Bunyaviridae: Orthobunyavirus) from field-collected mosquitoes

(Diptera: Culicidae) in Connecticut, USA: a ten-year analysis, 1997-2006. *Vector Borne Zoonotic Dis* 8: 175-188.

Andreadis TG, Anderson JF, Vossbrinck CR, Main AJ 2004. Epidemiology of West Nile virus in Connecticut, USA: a five year analysis of mosquito data 1999-2003. *Vector-Borne and Zoonotic Dis* 4:360-378.

Aramburu J, Ramal C, Witzig R 1999. Malaria reemergence in the Peruvian Amazon Region. *Emerg Infect Dis* 5: 209–215.

Ashfaq M, Hebert PDN, Mirza JH, Khan AM, Zafar Y, et al 2014. Analyzing Mosquito (Diptera: Culicidae) Diversity in Pakistan by DNA Barcoding. *PLoS ONE* 9(5): e97268.

Azpurua J, Cruz D, Valderrama A, Windsor D 2010. *Lutzomyia* Sand Fly Diversity and Rates of Infection by *Wolbachia* and an Exotic *Leishmania* Species on Barro Colorado Island, Panama. *PLoS* 4: 1-8.

Benarroch EI 1931. Studies on malaria in Venezuela. *Am J Epidemiol* 14: 690–693.

Besansky N, Severson D, Ferdig M 2003. DNA barcoding of parasites and invertebrate disease vectors: what you don't know can hurt you. *Trends parasitol* 19: 545-546.

Blaxter ML 2004. The promise of a DNA taxonomy. *Philos Trans R Soc Lond B Biol Sci* 359: 669–679.

Carpenter SJ, LaCasse WJ 1955. *Mosquitoes of North America (north of Mexico)*. Jhon Goetz, Berkeley, 495 pp.

Chamberlain RW, Sires RK, Nelson DB 1956. Infection of *Mansonia perturbans* and *Psorophora ferox* Mosquitoes with Venezuelan Encephalomyelitis Virus. *Exp Biol Med* 91: 215-216.

Contreras MA, Vivero R, Velez ID, Porter C, Uribe S 2014. DNA Barcoding for the Identification of Sand Fly Species (Diptera, Psychodidae, Phlebotominae) in Colombia. *PloS ONE* 9(1): e85496.

Cook S, Diallo M, Sall A, Cooper A, Holmes E 2005. Mitochondrial markers for molecular identification of *Aedes* mosquitoes (Diptera: Culicidae) involved in transmission of arboviral disease in West Africa. *J Med Entomol* 42: 19-28.

Cova-García P, Sutil E, Rausseo JA 1966. *Mosquitos (Culicinos) de Venezuela*. Tomo I and Tomo II. Ministerio de Sanidad y Asistencia Social, Caracas. 816 pp.

Cywinska A, Hannan M, Kevan P, Roughley R, Iranpour M, Hunter F 2010. Evaluation of DNA barcoding and identification of new Haplomorphos in Canadian derflies and horseflies. *Med Vet Entomol* 24: 382-410.

Cywinska A, Hunter FF, Hebert PD 2006. Identifying Canadian mosquito species through DNA barcodes. *Med Vet Entomol* 20: 413-424.

Dhananjeyan K, Paramasivan R, Tewari S, Rajendran R, Thenmozhi V, Jerald V, Venkatesh A, Tyagi B 2010. Molecular identification of mosquito vectors using genomic DNA isolated from eggshells, larval and pupal exuvium. *Trop biomed* 27: 47-53.

Díaz-Nieto L, Maciá A, Parisi G, Farina J, Vidal-Domínguez, Perotti M, Berón C 2013.

Distribution of Mosquitoes in the South East of Argentina and First Report on the Analysis Based on 18S rDNA and COI Sequences. *PloS ONE* 8(9): e75516.

Edman JD, Kale HW 1971. Host behavior: Its influence on the feeding success of mosquitoes. *Ann ent Soc Am* 64: 513-516.

Felsenstein J 1985. Confidence Limits on Phylogenies: An Approach Using the Bootstrapp. *Evolution* 39: 783-791.

Folmer O, Black M, Hoeh W, Lutz R, Vrijenhoek R 1994. DNA primers for amplification of mitochondrial cytochrome c oxidase subunit I from diverse metazoan invertebrates. *Mol Mar Biol Biotechnol* 3: 294-299.

Forattini OP 2002. *Culicidologia médica: identificação, biologia e epidemiologia*, vol. II, EDUSP, São Paulo, 864 pp.

Gabaldon A, Cova Garcia P 1946. Zoogeografía de los anofelinos en Venezuela. I. Los dos vectores principales. *Tijeretazos Malar* 10: 78-127.

Golding N, Nunn M, Medlock J, Purse B, Vaux A, Schafer S 2012. West Nile virus vector *Culex modestus* established in southern England. *Parasit Vectors* 5: 32.

Groot H, Morales A, Romero M, Ferro C, Príaz E, Vidales H, Buitrago B, Olano V, Calvache D, Márquez G, de la Vega P, Rodríguez G 1996. Estudios de arbovirosis en Colombia en la década de 1970. *Biomedica* 16: 331-344.

Gubler D 2002 The Global Emergence/Resurgence of Arboviral Diseases As Public Health Problems. *Arch Med Res* 33: 330-342.

Harbach RE 2007. The Culicidae (Diptera): a review of taxonomy, classification and phylogeny. *Zootaxa* 1668: 591-638.

Harbach RE, Howard TM 2007. Index of currently recognized mosquito species (Diptera: Culicidae). *Eur Mos Bull* 23: 1-66.

Harbach RE, Kitching IJ 1998. Phylogeny and classification of the Culicidae (Diptera). *Syst Entomol* 23: 327-370.

Harbach, RE 2012. *Culex pipiens*: Species versus Species complex – Taxonomic History and Perspective. *J Am Mosq Contr Assoc* 28: 10-23

Harrington L, Edman J, Scott T 2001. Why Do Female *Aedes aegypti* (Diptera: Culicidae) Feed Preferentially and Frequently on Human Blood?. *J Med Entomol* 38: 411-422.

Hebert PD, Cywinska A, Ball SL, de Waard JR 2003. Biological identifications through DNA barcodes. *Proc Biol Sci* 270: 313-321.

Hoyos R, Uribe S, Velez I 2012a. Typification of Colombian specimens of *Lutzomyia longipalpis* (Diptera: Psychodidae) by “Barcoding”. *Rev Colomb Entomol* 38: 134-140.

Hoyos R, Usme J, Gallego-Gomez JC 2012b. Viral Evolutionary Ecology: Conceptual Basis of a New Scientific Approach for Understanding Viral Emergence. In L Nuno,



*Epidemiology - Current Perspectives on Research and Practice*, InTech, Rijeka, p. 119-130.

Hoyos-López R, Uribe S, Gallego-Gómez JC 2015a. Evolutionary relationships of West Nile virus detected in mosquitoes from a migratory bird zone of Colombian Caribbean. *Virology* 12(1): 80.

Hoyos-López R, Soto SU, Rúa-Uribe G, Gallego-Gómez JC 2015b. Molecular identification of Saint Louis encephalitis virus genotype IV in Colombia. *Mem Inst Oswaldo Cruz* 110(6): 719-725.

Hoyos-López R, Suaza V, Tenorio A, Uribe S, Gallego-Gómez J 2015c. Molecular detection of eastern equine encephalitis virus in mosquitoes from La Pintada (Antioquia). *Revista MVZ Córdoba* 20(3): 4800-4806.

Hoyos-Lopez R, Roman Pardo S, Castaño, JC, Gallego-Gómez JC 2015d. DNA barcode for typing of immature mosquitoes from Armenia and Circasia (Quindío, Colombia). *Revista Colombiana de Entomología* 41(2): 218-227.

Hoyos-López R, Suaza-Vasco J, Rúa-Uribe G, Uribe S, Gallego-Gómez JC 2016. Molecular detection of flaviviruses and alphaviruses in mosquitoes (Diptera: Culicidae) from coastal ecosystems in the Colombian Caribbean. *Memórias do Instituto Oswaldo Cruz* 111(10): 625-634.

Keesing F, Belden LK, Daszak P, Dobson A, Harvell DC, Holt RD, Hudson P, Jolles A, Jones KE, Mitchell CE, Myers SS, Bogich T, Ostfeld RS 2010. Impacts of biodiversity on the emergence and transmission of infectious diseases. *Nature* 468: 647-652.

Kimura M 1980. A simple method for estimating evolutionary rates of base substitutions through comparative studies of nucleotide sequences. *J Mol Evol* 16: 111-120.

Krzywinski J, Besansky NJ 2003. Molecular systematics of Anopheles: From subgenera to subpopulations. *Annu Rev Entomol* 48: 111-139.

Kulasekera V, Kramer L, Nasci R, Mostashari F, Cherry B, Trock S, Glaser C, Miller J 2001. West Nile Virus Infection in Mosquitoes, Birds, Horses, and Humans, Staten Island, New York, 2000. *Emerg Infect Dis* 7:722-725.

Kumar NP, Krishnamoorthy N, Sahu S, Rajavel A, Sabesan S, Jambulingam P 2013. DNA Barcodes indicate members of the *Anopheles fluviatilis* (Diptera: Culicidae) species complex to be conspecific in India. *Mol Ecol Resour* 13: 354-361.

Kumar NP, Rajavel AR, Natarajan R, Jambulingam P 2007. DNA barcodes can distinguish species of Indian mosquitoes (Diptera: Culicidae). *J Med Entomol* 44: 1-7.

Kumar NP, Srinivasan R, Jambulingam P 2012. DNA barcoding for identification of sand flies (Diptera: Psychodidae) in India. *Mol Ecol Resour* 3: 414-420.

Lane J 1953. *Neotropical Culicidae*, Vol. 1, University of São Paulo, São Paulo, 548 pp.

Larkin MA, Blackshields G, Brown NP, Chenna R, McGettigan PA, McWilliam H, Valentin F, Wallace IM, Wilm A, Lopez R, Thompson JD, Gibson TJ, Higgins DG 2007.

Clustal W and CLUSTALX version 2.0. *Bioinformatics* 23: 2947-2948.

Laurito M, de Oliveira T, Almiron W, Sallum MA 2013. COI barcode versus morphological identification of *Culex (Culex)* (Diptera: Culicidae) species: a case study using samples from Argentina and Brazil. *Mem Inst Oswaldo Cruz* 108: 110-122.

Librado P, Rozas J 2009. DnaSP v5: A software for comprehensive analysis of DNA polymorphism data. *Bioinformatics* 25: 1451-1452.

Linton YM, Pecor J, Porter C, Mitchell L, Garzón-Moreno A, Foley D, Pecor D, Wilkerson R 2013. Mosquitoes of eastern Amazonian Ecuador: biodiversity, bionomics and barcodes. *Mem Inst Oswaldo Cruz* 108: 100-109.

Lounibos LP, Linley JR 2008. A quantitative analysis of underwater oviposition by the mosquito *Mansonia titillans*. *Physiol Entomol* 12: 435-443.

Mattar S, Edwards E, Laguado J, González M, Alvarez J, Komar N 2005. West Nile Virus Antibodies in Colombian Horses. *Emerg Infect Dis* 11: 149-150.

Meier R, Shiyang K, Vaidya G, Ng P 2006. Barcoding and Taxonomy in Diptera: A Tale of High Intraspecific Variability and Low Identification Success. *Syst Biol* 55: 715-728.

Mendez W, Liria J, Navarro J, García C, Freier J, Salas R, Weaver S, Barrera R 2001. Spatial Dispersion of Adult Mosquitoes (Diptera: Culicidae) in a Sylvatic Focus of Venezuelan Equine Encephalitis Virus. *J Med Entomol* 38: 813-821.

Montoya-Lerma J, Solarte Y, Giraldo-Calderon G, Quiñones M, Ruiz-López F, Wilkerson R, González R 2011. Malaria vector species in Colombia – A review. *Mem Inst Oswaldo Cruz* 106: 223-238.

Moreno M, Bickersmith S, Harlow W, Hildebrandt J, McKeon SN, Silva-do-Nascimento TF, Loaiza JR, Ruiz F, Lourenço-de-Oliveira R, Sallum MA, Bergo ES, Fritz GN, Wilkerson RC, Linton YM, Juri MJ, Rangel Y, Póvoa MM, Gutiérrez, Builes LA, Correa MM, Conn JE 2013. Phylogeography of the neotropical *Anopheles triannulatus* complex (Diptera: Culicidae) supports deep structure and complex patterns. *Parasit Vectors* 6: 47.

Muñoz M, Navarro JC 2012. Virus Mayaro: un arbovirus reemergente en Venezuela y Latinoamérica. *Biomedica* 32: 286-302.

Naranjo N, Rosero D, Rua G, Luckhart S, Correa M 2013. Abundance, behavior and entomological inoculation rates of anthropophilic anophelines from a primary Colombian malaria endemic area. *Parasit Vectors* 7: 61.

Oda T, Uchida K, Mori A, Mine M, Eshita Y, Kurokawa K, Kato K, Tahara H 1999. Effects of high temperature on the emergence and survival of adult *Culex pipiens molestus* and *Culex quinquefasciatus* in Japan. *J Am Mosq Control Assoc* 15: 153-156.

Olano V, Tinker M 1993. Ecología del *Aedes aegypti* en un pueblo de Colombia, Suramérica. *Biomedica* 13: 5-14.

- Oliveira-Ferreira J, Lourenco-de-Oliveira R, Teva A, Deane LM, Daniel-Ribeiro CT  
1990. Natural malaria infections in anophelines in Rondonia State, Brazilian Amazon.  
*Am J Trop Med Hyg* 43: 6-10.
- Parra G, Suárez L 2012. Mosquitos (Díptera: Culicidae) vectores potenciales de  
arbovirus en la región de Urabá, noroccidente de Colombia. *Biomedica* 32: 252-262.
- Pecor JE, Harbach RE, Peyton EL, Roberts DR, Rejmankova E, Manguin S, Palanko J  
2002. Mosquitos studies in Belize, Central America: records, taxonomic notes, and a  
check list of species. *J Am Mosq Control Assoc* 18: 241-276.
- Reinert, JF, Harbach RE, Kitching IJ 2004. Phylogeny and classification of Aedini  
(Diptera: Culicidae) based on morphological characters of all life stages. *Zool J Linnean  
Soc* 142: 289–368.
- Rivas F, Diaz A, Cardenas M, Daza E, Bruzon L, Alcalá A, De la Hoz O, Caceres M,  
Aristizabal G, Martinez J, Revelo D, De la Hoz F, Boshell J, Camacho T, Calderon L,  
Olano V, Villareal L, Roselli D, Alvarez G, Ludwing G, Tsai T 1995. Epidemic  
Venezuelan Equine Encephalitis in La Guajira, Colombia, 1995. *J infect Dis* 175: 828-  
832.
- Rivera J, Currie D 2009. Identification of Nearctic black flies using DNA barcodes  
(Diptera: Simuliidae). *Mol Ecol Resour* 9: 224-236.

Rodríguez G, Boshell J 1996. Encefalitis equina venezolana. *Biomedica* 15: 172-182.

Ronderos RA, Bachmann A 1963. Mansonini neotropicales I (Diptera: Culicidae). *Rev Soc Entomol Argent* 26: 57-65.

Rosa-Freitas MG, Lourenco-de-Oliveira R, de Carvalho-Pinto CJ, Flores-Mendoza C, Silva-do-Nascimento TF 1998. Anopheline species complexes in Brazil. Current knowledge of those related to malaria transmission. *Mem Inst Oswaldo Cruz* 93: 651-655.

Rosero D, Jaramillo L, Conn J, Correa M 2012. Genetic Diversity of *Anopheles triannulatus* s.l. (Diptera: Culicidae) from Northwestern and Southeastern Colombia. *Am J Trop Med Hyg* 87: 910-920.

Ruiz F, Linton Y, Ponsoby D, Conn J, Herrera M, Quiñones M, Velez ID, Wilkerson R 2010. Molecular comparison of topotypic specimens confirms *Anopheles (Nyssorhynchus) dunhami* Causey (Diptera: Culicidae) in the Colombian Amazon. *Mem Inst Oswaldo Cruz* 105: 899-903.

Ruiz F, Wilkerson R, Conn J, McKeon S, Levin D, Quiñones M, Pova M, Linton Y 2012. DNA barcoding reveals both known and novel taxa in the Albitarsis Group (*Anopheles: Nyssorhynchus*) of Neotropical malaria vectors. *Parasit Vectors* 5: 44.

Saitou N, Nei M 1987. The neighbor-joining method: a new method for reconstructing phylogenetic trees. *Mol Biol Evol* 4: 406-425.

Silva do Nascimento TF, Lourenco de Oliveira R 2002. *Anopheles halophylus*, a new species of the subgenus *Nyssorhynchus* (Diptera: Culicidae) from Brazil. *Mem Inst Oswaldo Cruz* 97: 801–811.

Silva do Nascimento TF, Wilkerson RC, Lourenco de Oliveira R, Monteiro FA, 2006. Molecular confirmation of the specific status of *Anopheles halophylus* (Diptera: Culicidae) and evidence of a new cryptic species within *An. triannulatus* in central Brazil. *J Med Entomol* 43: 455–459.

Souza Lopez OL, Abreu L, Coimbra TL, Francy DB, Jakob WL, Calisher C 1981. Emergence of a new arbovirus disease in Brazil. III. Isolation of Rocio virus from *Psorophora ferox* (Humboldt, 1819). *Am J Epidemiol* 113: 122-125.

Tadei WP, Dutary Thatcher B 2000. Malaria vectors in the Brazilian Amazon: *Anopheles* of the subgenus *Nyssorhynchus*. *Rev Inst Med Trop Sao Paulo* 42: 87–94.

Taira K, Toma T, Tamashiro M, Miyagi I 2012. DNA barcoding for identification of mosquitoes (Diptera: Culicidae) from the Ryukyu Archipelago, Japan. *Med Entomol Zool* 63(4): 289-306.

Tajima F 1989. Statistical method for testing the neutral mutation hypothesis by DNA polymorphism. *Genetics* 123: 585–595.

Tamura K, Peterson D, Peterson N, Stecher G, Nei M, Kumar S 2011. MEGA5: Molecular Evolutionary Genetics Analysis using Maximum Likelihood, Evolutionary Distance, and Maximum Parsimony Methods. *Mol Biol Evol* 28: 2731-2739.

Tanaka K, Mizusawa K, Saugstad ES 1979. A revision of the adult and larval mosquitoes of Japan (including the Ryukyu Archipelago and the Ogasawara Islands) and Korea (Diptera: Culicidae). *Contrib Am Entomol Inst* 16: 1-987.

Yanoviak SP, Paredes JE, Lounibos LP, Weaver SC 2006. Deforestation alters phytotelm habitat availability and mosquito production in the Peruvian Amazon. *Ecol Appl* 16: 1854-1864.

Unlu I, Kramer WL, Roy AF, Foil LD 2010. Detection of West Nile virus RNA in mosquitoes and identification of mosquito blood meals collected at alligator farms in Louisiana. *J Med Entomol* 47: 625-633.

Valentini A, Pompanom F, Taberlet P 2008. DNA Barcode for ecologist. *Trends Ecol Evol* 24: 110-117.

Wang G, Li C, Guo X, Xing D, Dong Y, Wang Z, Zhang Y, Liu M, Zheng Z, Zhang H, Zhu X, Wu Z, Zhao T 2012. Identifying the Main Mosquito Species in China Bases on DNA Barcoding. *PLoS ONE* 7(10): e47051.

Zamora-Delgado J, Castaño, JC, Hoyos-López, R 2015. DNA barcode sequences used to identify *Aedes (Stegomyia) albopictus* (Diptera: Culicidae) in La Tebaida (Quindío, Colombia). *Revista Colombiana de Entomología* 41(2): 212-217.



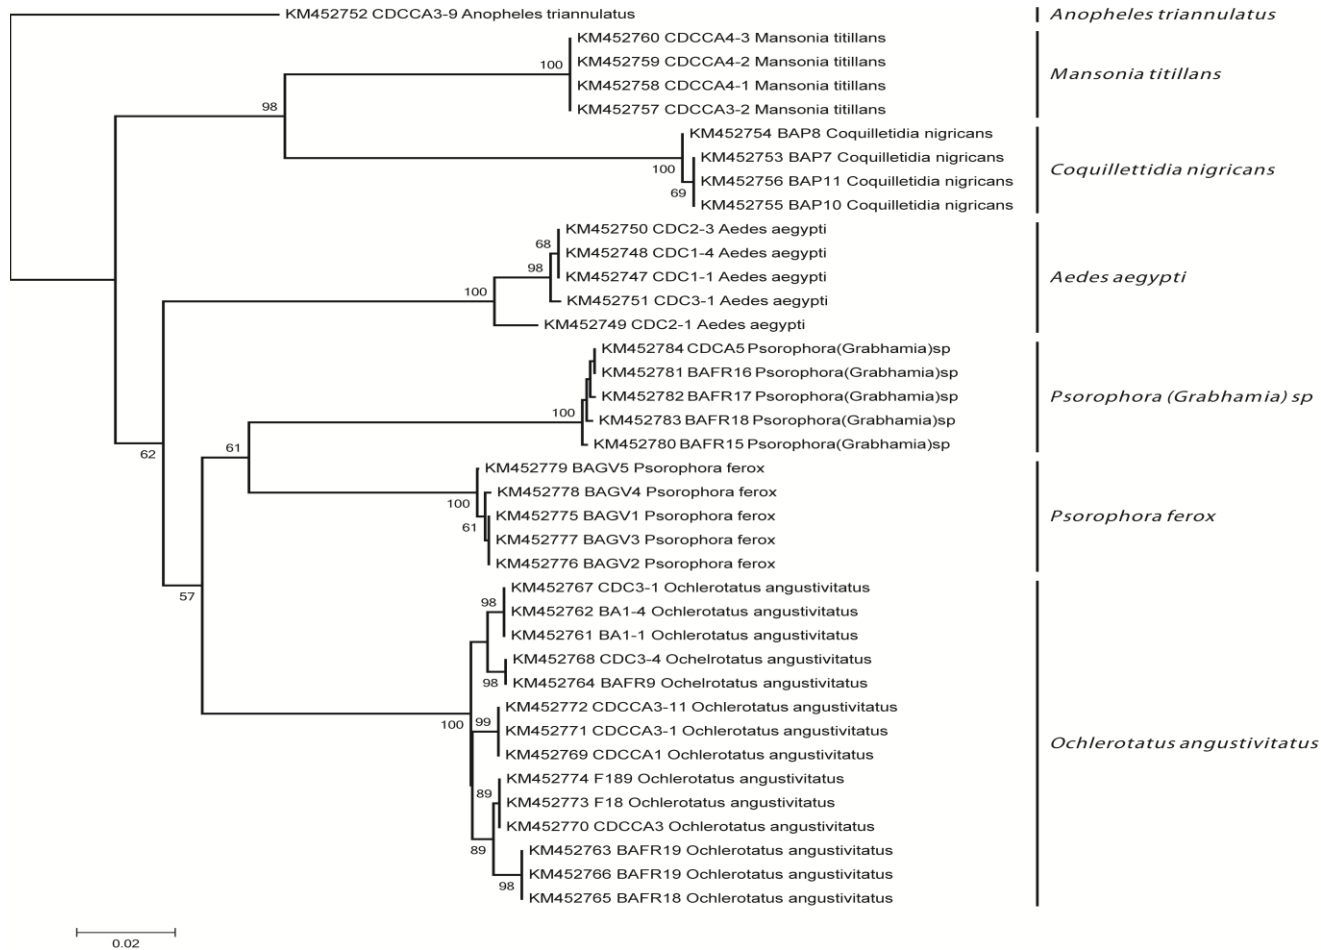

Figure 1. Neighbor-joining dendrogram using DNA barcode sequences (Cytochrome oxidase I) (Kimura two parameter genetic distances, Bootstrap = 1000 replicates). Percentage of replicate trees in which the associated taxa clustered together in the bootstrap test is show next to the branch (only >50%). The final dataset comprised 574 nucleotides, including all codon positions. Every sequence shows his number access Genbank before mosquito code and species identification.

Table I. Diversity of DNA barcode sequences for seven species of mosquitoes collected in rural area from La Pintada.

| Species                    | n <sup>a</sup> | H <sup>b</sup> | S <sup>c</sup> | GDs   |
|----------------------------|----------------|----------------|----------------|-------|
| <i>Oc. angustivittatus</i> | 14             | 5              | 14             | 0.010 |
| <i>Ae. aegypti</i>         | 5              | 3              | 13             | 0.009 |
| <i>Ma. titillans</i>       | 4              | 1              | -              | 0.000 |
| <i>Ps. ferox</i>           | 5              | 3              | 2              | 0.001 |
| <i>Ps. (Grabhamia) sp</i>  | 5              | 4              | 3              | 0.054 |
| <i>Cq. nigricans</i>       | 4              | 2              | 1              | 0.075 |
| <i>An. triannulatus</i>    | 1              | 1              | -              | -     |
| Total                      | 38             | 19             | -              | -     |

<sup>a</sup>Sequences characterized. <sup>b</sup>Haplotypes. <sup>c</sup>Polymorphism sites. <sup>d</sup>Intra-specific genetic distances.

Table II. Genetic distances between DNA barcode sequences belonging to seven mosquito species identified in rural area from La Pintada (Antioquia).

|                                | 1            | 2            | 3            | 4            | 5            | 6            | 7     |
|--------------------------------|--------------|--------------|--------------|--------------|--------------|--------------|-------|
| 1. <i>Ae. aegypti</i>          |              | 0,017        | 0,016        | 0,016        | 0,015        | 0,015        | 0,017 |
| 2. <i>An. triannulatus</i>     | <b>0,153</b> |              | 0,016        | 0,016        | 0,016        | 0,016        | 0,016 |
| 3. <i>Cq. nigricans</i>        | <b>0,172</b> | <b>0,166</b> |              | 0,014        | 0,014        | 0,015        | 0,016 |
| 4. <i>Ma. titillans</i>        | <b>0,146</b> | <b>0,152</b> | <b>0,135</b> |              | 0,016        | 0,017        | 0,018 |
| 5. <i>Ps (Grabhamia) sp</i>    | <b>0,142</b> | <b>0,150</b> | <b>0,156</b> | <b>0,161</b> |              | 0,012        | 0,013 |
| 6. <i>Oc. angustitativatus</i> | <b>0,136</b> | <b>0,141</b> | <b>0,164</b> | <b>0,153</b> | <b>0,106</b> |              | 0,014 |
| 7. <i>Ps. ferox</i>            | <b>0,137</b> | <b>0,133</b> | <b>0,173</b> | <b>0,176</b> | <b>0,108</b> | <b>0,110</b> |       |

Numbers in boldface indicate interspecific genetic distances and the others values show standard deviations.

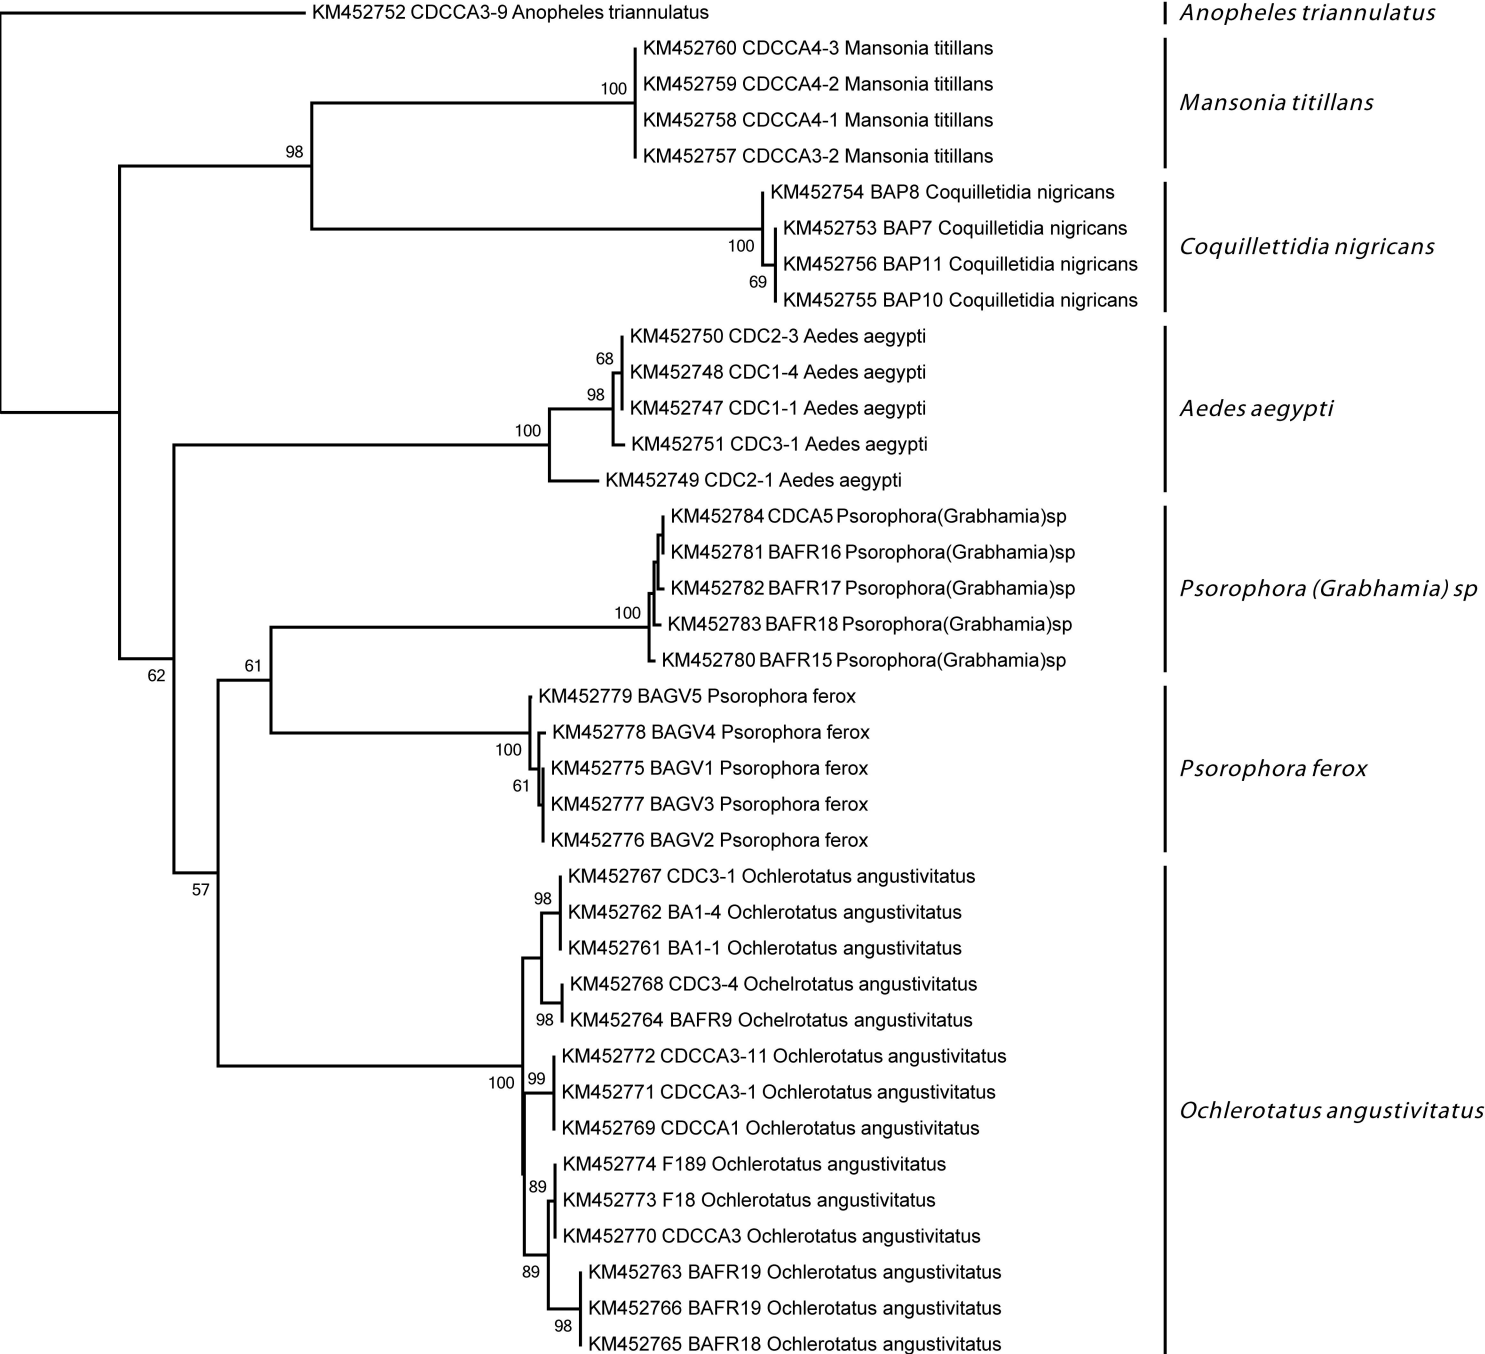

0.02
